# Supplementary material for: Reactive uptake of ammonia to secondary organic aerosols: kinetics of organonitrogen formation
Source: Copernicus journal article supplement (doi:10.5194/acp-15-13569-2015), 2015-12-09
Supplement: Supplementary file 1 [file acp-15-13569-2015-supplement.pdf]

Supplement of Atmos. Chem. Phys., 15, 13569–13584, 2015  
<http://www.atmos-chem-phys.net/15/13569/2015/>  
doi:10.5194/acp-15-13569-2015-supplement  
© Author(s) 2015. CC Attribution 3.0 License.

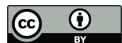

*Supplement of*

## **Reactive uptake of ammonia to secondary organic aerosols: kinetics of organonitrogen formation**

**Y. Liu et al.**

*Correspondence to:* J. Liggio ([john.liggio@ec.gc.ca](mailto:john.liggio@ec.gc.ca))

The copyright of individual parts of the supplement might differ from the CC-BY 3.0 licence.

## Supporting Information

### OH concentration estimation method.

The OH concentration during the photochemical oxidation of m-xylene were calculated based upon the decay of m-xylene and the known second-order rate constant with respect to OH (Atkinson and Arey, 2003), while it was calculated based upon the difference between the measured decay of  $\alpha$ -pinene and the predicted decay curve due to consumption by O<sub>3</sub> in ozonolysis of  $\alpha$ -pinene experiments. During the ozonolysis of  $\alpha$ -pinene, OH can be formed through decomposition of peroxides in the dark (Zhang and Zhang, 2005). Both O<sub>3</sub> and OH react with  $\alpha$ -pinene. Thus,

$$-\frac{dc_{\text{pin-O}_3}}{dt} = k_{2,\text{pin-O}_3} c_{\text{O}_3} c_{\text{pin}} \quad (\text{S1})$$

$$-\frac{dc_{\text{pin-OH}}}{dt} = k_{2,\text{pin-OH}} c_{\text{OH}} c_{\text{pin}} \quad (\text{S2})$$

where  $c_{\text{pin-O}_3}$ ,  $c_{\text{pin-OH}}$  and  $c_{\text{pin}}$  are the concentration  $\alpha$ -pinene consumed by O<sub>3</sub>, OH and the measured concentration of  $\alpha$ -pinene (molecules cm<sup>-3</sup>), respectively;  $c_{\text{O}_3}$  and  $c_{\text{OH}}$  are the concentration of O<sub>3</sub> and OH (molecules cm<sup>-3</sup>);  $k_{2,\text{pin-O}_3}$  and  $k_{2,\text{pin-OH}}$  are the second-order rate constant for O<sub>3</sub> and OH with respect to  $\alpha$ -pinene (cm<sup>3</sup> molecule<sup>-1</sup> s<sup>-1</sup>), respectively. Using the measured concentration of O<sub>3</sub> and  $\alpha$ -pinene, we can predict the concentration of  $\alpha$ -pinene consumed by O<sub>3</sub>. Namely,

$$\Delta c_{\text{pinO}_3,t_i} = k_{2,\text{pin-O}_3} c_{\text{O}_3,t_i} c_{\text{pin},t_i} \Delta t \quad (\text{S3})$$

where,  $t_i$  is the time.

If we assume that alpha-pinene decreases only due to reaction with O<sub>3</sub> or OH, then

$$c_{\text{pin}_{\text{OH},t_i}} = c_{\text{pin},t_i} - c_{\text{pin}_{\text{O}_3,t_i}} \quad (\text{S4})$$

The results using this estimation method are shown in Figure S1 .

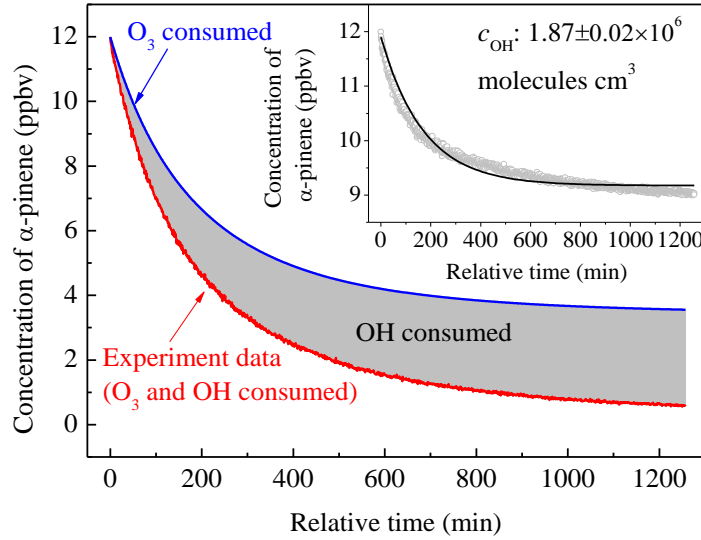

Figure S1. Demonstration of the OH concentration calculation in an ozonolysis of  $\alpha$ -pinene experiment (Exp. P8). The inset graph shows the curve fitting with exponential decay of  $\alpha$ -pinene consumed by OH.

### Details of the uptake model.

The aerosol radius can be written in terms of  $m_{\text{NOC}}$

$$a = \left( \frac{3m_{\text{NOC}}}{4\pi\rho} + a_0^3 \right)^{\frac{1}{3}} \quad (\text{S5})$$

where  $a_0$  and  $\rho$  represent the initial seed particle radius and the density of the organic mass. Equation (S6) can then be derived by substituting Eq. (1) with Eq. (S5),

$$\int_{m_0}^m (bm_{\text{NOC}} + d)^{-2/3} dm_{\text{NOC}} = \int_{t_0}^t \gamma_{\text{obs}} \pi c_{\text{NH}_3} \langle c \rangle F_h dt \quad (\text{S6})$$

Where,  $b = \frac{3}{4\pi\rho}$ ,  $d = a_0^3$ . The initial seed particle radii were measured in each experiment and the density of the organic mass was assumed to be  $1.4 \text{ g cm}^{-3}$

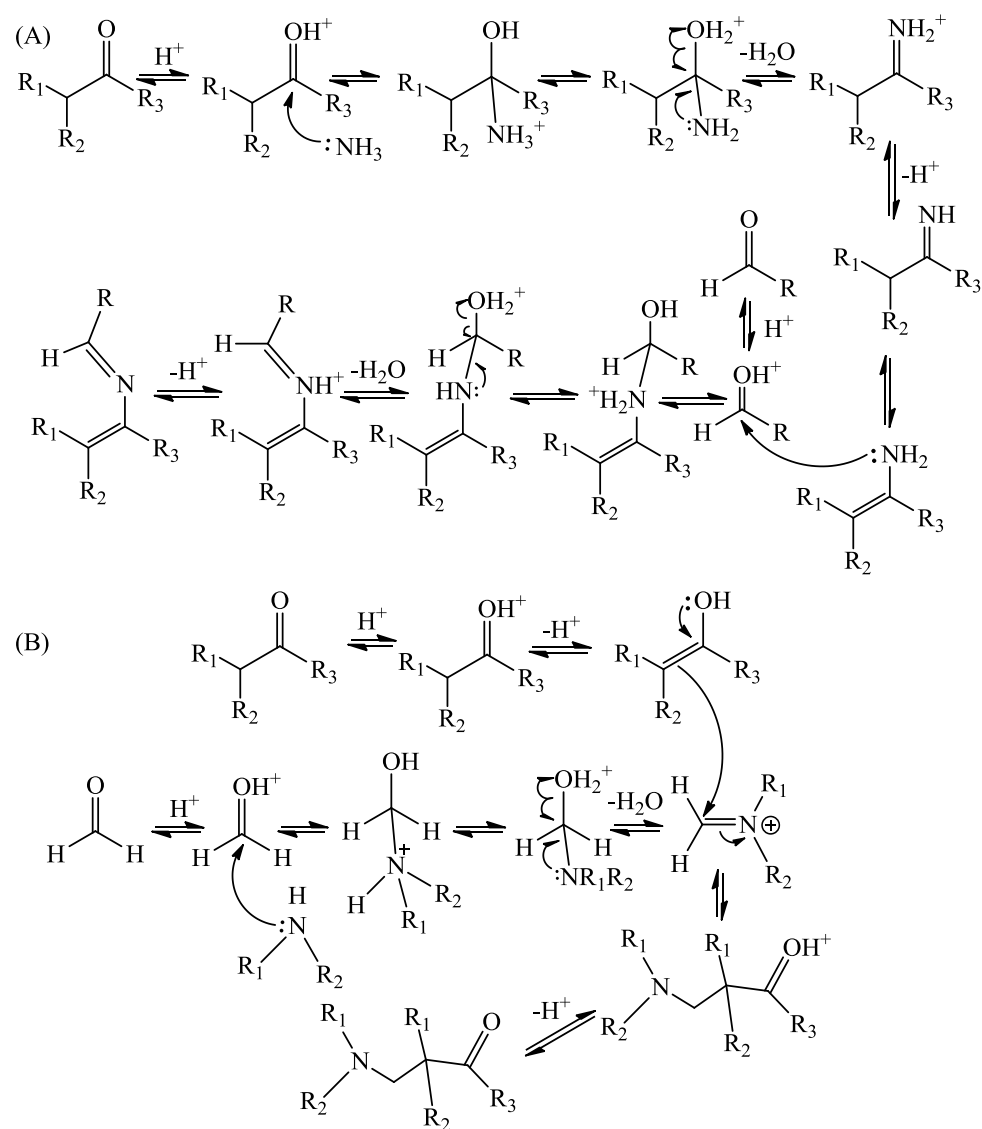

Scheme S1. Generic (A) reaction mechanism to form Schiff-base and (B) Mannich reaction mechanism for reactions between carbonyl compounds and ammonia/ammonium.

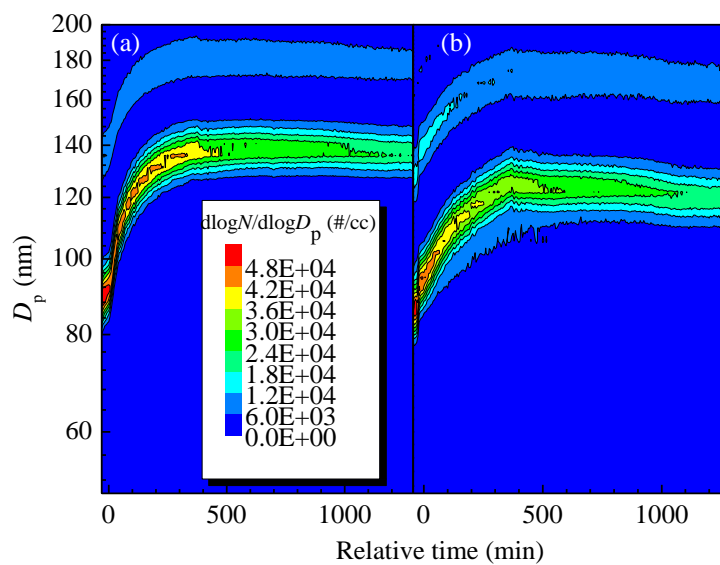

Figure S2. Changes of particle size as a function of time during (a) the ozonolysis of  $\alpha$ -pinene (Exp. P6) and (b) UV- $H_2O_2$  oxidation of m-xylene (Exp. M16).

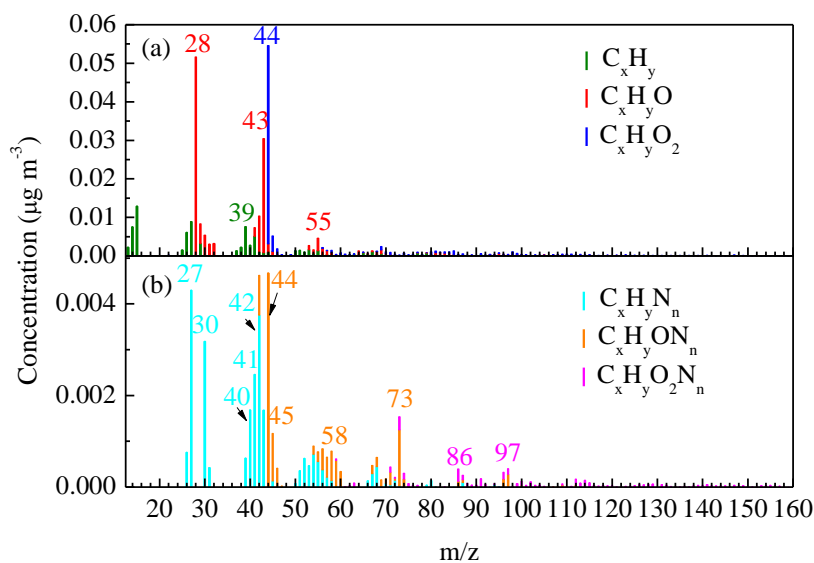

Figure S3. Mass spectra of (a) non-N-containing species fragments and (b) N-containing species fragments in the SOA formed by OH oxidation of m-xylene in the presence of 66 ppbv  $\text{NH}_3$  (Exp. M16).

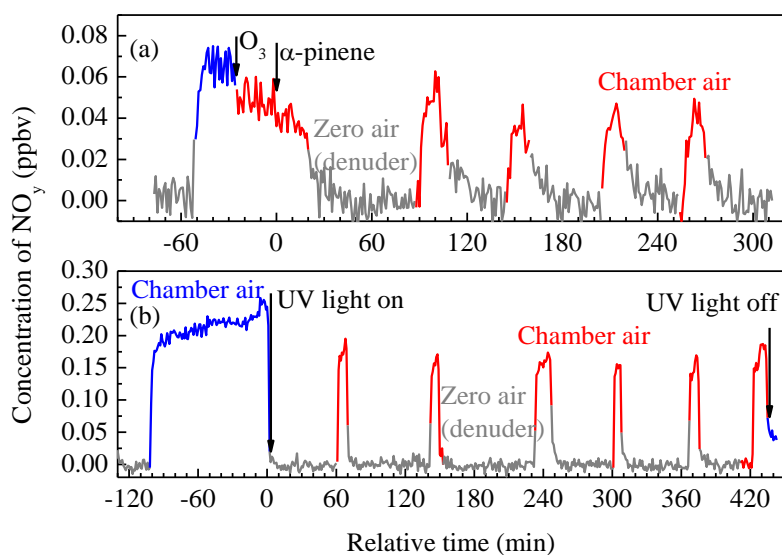

Figure S4.

Gaseous  $\text{NO}_y$  concentration in the chamber for (a)  $\text{O}_3$  oxidation of  $\alpha$ -pinene (Exp. P13) and (b) OH oxidation of m-xylene (Exp. M20).

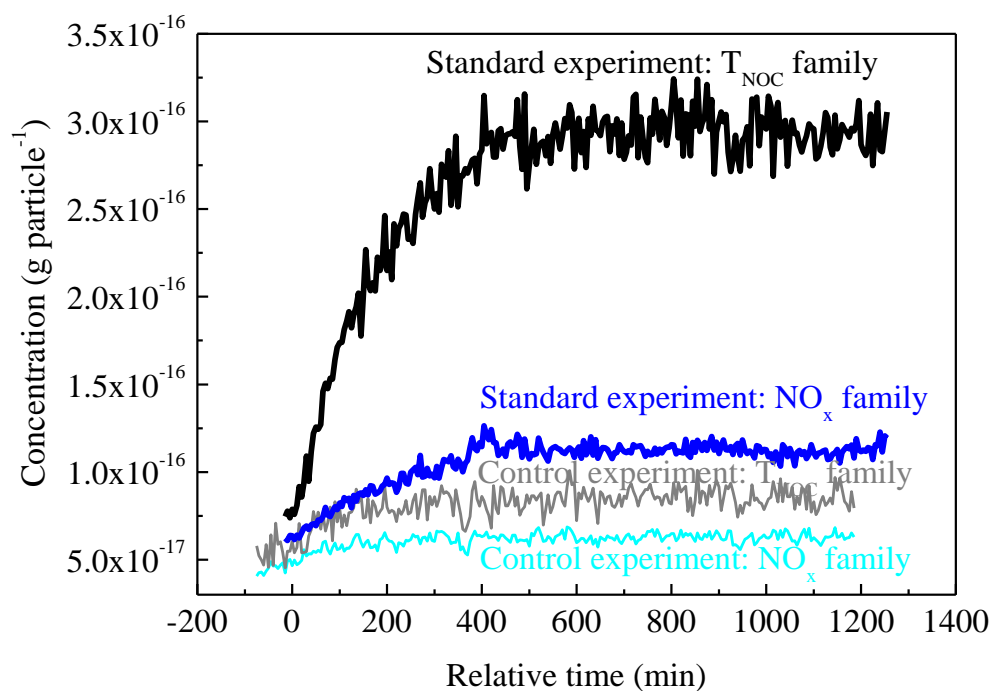

Figure S5. Comparison of the NO<sub>x</sub> fragment family and T<sub>NOC</sub> (total nitrogen) concentrations in typical (Exp. P8) and control experiments (Exp. B7). The experimental conditions in the control experiment are the same as that in standard experiment with the exception of 0 ppbv of  $\alpha$ -pinene.

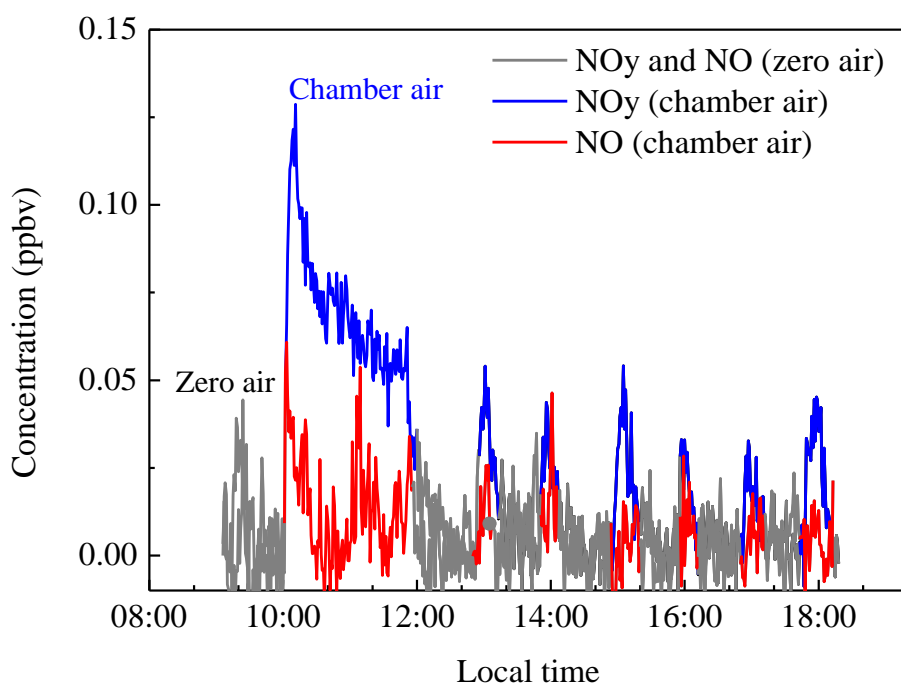

Figure S6. Typical concentration of NO in the chamber (Exp. P14).

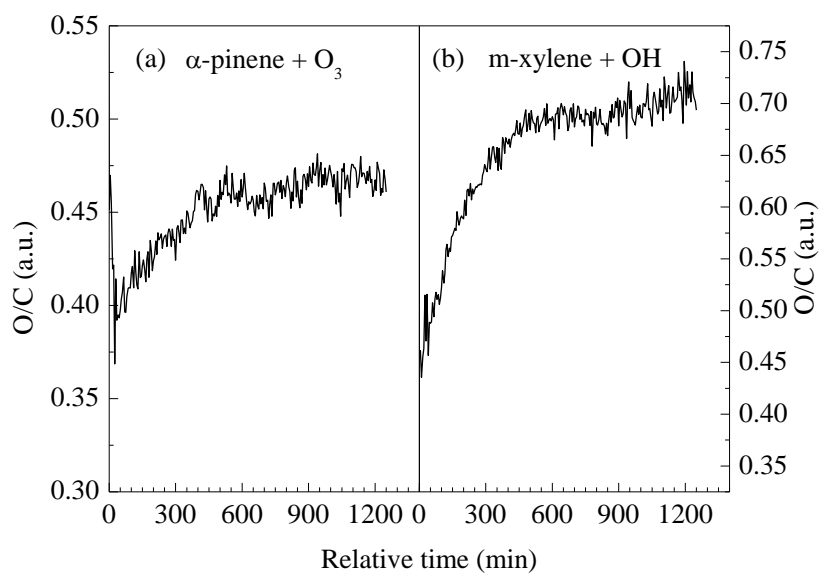

Figure S7. Typical O/C evolution for (A) ozonolysis of  $\alpha$ -pinene (Exp. P13) and (B) OH oxidation of m-xylene (Exp. M15).

Table S1. Assignment of IR bands.



| Wavenumber of observed IR bands (cm <sup>-1</sup> ) | Assignment                                                                                                                                                                                           | Ranges reported in literatures (cm <sup>-1</sup> )                   |
|-----------------------------------------------------|------------------------------------------------------------------------------------------------------------------------------------------------------------------------------------------------------|----------------------------------------------------------------------|
| 3490                                                | NH <sub>2</sub> asymmetric stretching (Simons, 1978)                                                                                                                                                 | ~3500                                                                |
| 3240                                                | NH <sub>3</sub> <sup>+</sup> asymmetric stretching (Simons, 1978)<br>Secondary amide N-H stretching (Stuart, July 2004)                                                                              | 3200-2800<br>3300-3250                                               |
| 3060                                                | Ar-H Stretching (Simons, 1978)<br>Secondary amide amide II overtone                                                                                                                                  | 3100-3000<br>3100-2060                                               |
| 2962                                                | CH <sub>3</sub> symmetric stretching (Simons, 1978;Stuart, July 2004)                                                                                                                                | 2972-2952                                                            |
| 2860                                                | CH <sub>3</sub> asymmetric stretching or CH <sub>2</sub> stretching (Simons, 1978;Stuart, July 2004)                                                                                                 | 2882-2862 or 863-2843                                                |
| 2675, 2630                                          | Combination bands of -NH <sub>3</sub> <sup>+</sup> and -NH <sub>2</sub> <sup>+</sup> deformation vibration or -NH <sup>+</sup> stretching (Simons, 1978)                                             | 2800-2400 (1 $\nu$ )<br>2700-2300 (2 $\nu$ )<br>2700-2330 (3 $\nu$ ) |
| 2195                                                | C $\equiv$ N stretching in C=C-C $\equiv$ N (Simons, 1978)<br>N=C=N stretching (Simons, 1978)                                                                                                        | 2195<br>2170-2100                                                    |
| 1725                                                | C=O stretching (Schwartz et al., 2010;Stuart, July 2004)                                                                                                                                             | 1725-1700                                                            |
| 1660                                                | C=N stretching (Nguyen et al., 2013;Lin-Vien et al., 1991;Bruns et al., 2010)<br>Oxime C=N-OH stretching (Stuart, July 2004)<br>Nitrite N=O stretching (Stuart, July 2004)                           | 1650-1590<br>1690-1620<br>1680-1650                                  |
| 1640                                                | NH <sub>2</sub> bending (Simons, 1978;Stuart, July 2004)<br>C=N stretching (Bruns et al., 2010)<br>NO <sub>2</sub> asymmetric stretching in RONO <sub>2</sub> (Bruns et al., 2010;Stuart, July 2004) | 1627-1590;1638-1602<br>1690-1620<br>1660-1620                        |
| 1563                                                | NH <sub>2</sub> bending (Nguyen et al., 2013)<br>Secondary amide N-H bending, C-N stretching (Stuart, July 2004)<br>C=C stretching (Stuart, July 2004)                                               | 1563<br>1560-1530<br>1600-1430                                       |
| 1423                                                | C-H bending (Bruns et al., 2010)<br>C-O-H bending (in-plane)<br>C-N stretching (Lin-Vien et al., 1991)                                                                                               | 1485-1430<br>1430<br>1430-1390                                       |
| 1315                                                | C-N stretching (Simons, 1978;Stuart, July 2004)<br>NO <sub>2</sub> symmetric stretching in RONO <sub>2</sub> (Bruns et al., 2010)                                                                    | 1360-1250<br>1280                                                    |
| 1120                                                | SO symmetric stretching in Na <sub>2</sub> SO <sub>4</sub> (Stuart, July 2004;Miller and Wilkins, 1952)                                                                                              | 1120                                                                 |
| 1050                                                | C-O-C stretching (Simons, 1978)<br>C-N-C asymmetric stretching (Lin-Vien et al., 1991)                                                                                                               | 1050-1010<br>1058                                                    |
| 950                                                 | O-H deformation vibration (Simons, 1978)                                                                                                                                                             | 950-900<br>965-930                                                   |

|     |                                                                   |         |
|-----|-------------------------------------------------------------------|---------|
| 870 | Oxime N-O stretching (Stuart, July 2004)                          |         |
|     | NH <sub>2</sub> wag(out-of-plane) (Simons, 1978)                  | 900-650 |
|     | C-H bending (out-of-plane) (Stuart, July 2004)                    | 900-690 |
|     | NO symmetric stretching in RONO <sub>2</sub> (Bruns et al., 2010) | 860     |
| 785 | NH <sub>2</sub> wag(out-of-plane) (Simons, 1978)                  | 900-650 |
|     | C-N-C symmetric stretching (Lin-Vien et al., 1991)                | 762     |
|     | C-H bending (out-of-plane) (Stuart, July 2004)                    | 900-690 |
|     | NH <sub>2</sub> wag(out-of-plane) (Simons, 1978)                  | 900-650 |
| 740 | C-H bending (out-of-plane) (Stuart, July 2004)                    | 900-690 |

Table S2. Reactive uptake coefficients to form NOC and NH<sub>4</sub><sup>+</sup>

| Exp No <sup>a</sup> . | ( $\gamma_{t,ini}$ ) <sup>b</sup> | ( $\gamma_{NH_4}$ ) <sup>c</sup> | ( $\gamma_{t,final}$ ) <sup>d</sup> |
|-----------------------|-----------------------------------|----------------------------------|-------------------------------------|
| P1                    | $7.15 \pm 0.30 \times 10^{-3}$    | $6.20 \pm 0.28 \times 10^{-3}$   | $4.87 \pm 0.27 \times 10^{-5}$      |
| P2                    | $9.87 \pm 0.33 \times 10^{-3}$    | $8.96 \pm 0.31 \times 10^{-3}$   | $4.04 \pm 0.25 \times 10^{-5}$      |
| P3                    | $2.02 \pm 0.10 \times 10^{-2}$    | $1.78 \pm 0.09 \times 10^{-2}$   | $1.74 \pm 0.31 \times 10^{-5}$      |
| 4P                    | $1.36 \pm 0.05 \times 10^{-2}$    | $1.14 \pm 0.04 \times 10^{-2}$   | $2.16 \pm 0.40 \times 10^{-5}$      |
| P5                    | $5.57 \pm 0.09 \times 10^{-3}$    | $4.45 \pm 0.06 \times 10^{-3}$   | $5.20 \pm 0.16 \times 10^{-5}$      |
| P6                    | $1.15 \pm 0.04 \times 10^{-2}$    | $1.01 \pm 0.04 \times 10^{-2}$   | $2.06 \pm 0.32 \times 10^{-5}$      |
| B7                    | -                                 | -                                | -                                   |
| P8                    | $1.12 \pm 0.07 \times 10^{-2}$    | $9.61 \pm 0.62 \times 10^{-3}$   | $6.10 \pm 0.47 \times 10^{-5}$      |
| P9                    | $9.05 \pm 1.14 \times 10^{-3}$    | $7.94 \pm 1.09 \times 10^{-3}$   | $0 \pm 0.46 \times 10^{-5}$         |
| P10                   | $9.11 \pm 0.46 \times 10^{-3}$    | $8.41 \pm 0.45 \times 10^{-3}$   | -                                   |
| P11                   | $7.41 \pm 0.48 \times 10^{-3}$    | $6.82 \pm 0.45 \times 10^{-3}$   | $6.09 \pm 0.33 \times 10^{-5}$      |
| P12                   | $6.55 \pm 0.40 \times 10^{-3}$    | $6.00 \pm 0.37 \times 10^{-3}$   | $4.62 \pm 0.29 \times 10^{-5}$      |
| P13                   | $7.03 \pm 0.40 \times 10^{-3}$    | $6.57 \pm 0.39 \times 10^{-3}$   | -                                   |
| P14                   | $7.39 \pm 0.37 \times 10^{-3}$    | $6.69 \pm 0.36 \times 10^{-3}$   | -                                   |
| M15                   | $1.03 \pm 0.05 \times 10^{-2}$    | $3.40 \pm 0.46 \times 10^{-3}$   | $0 \pm 2.53 \times 10^{-5}$         |
| M16                   | $5.92 \pm 0.31 \times 10^{-3}$    | $2.30 \pm 0.23 \times 10^{-3}$   | $0 \pm 2.12 \times 10^{-5}$         |
| M17                   | $5.43 \pm 0.22 \times 10^{-3}$    | $1.98 \pm 0.22 \times 10^{-3}$   | -                                   |
| M18                   | $3.29 \pm 0.17 \times 10^{-3}$    | $6.62 \pm 0.14 \times 10^{-4}$   | $0 \pm 3.00 \times 10^{-5}$         |
| M19                   | $3.44 \pm 0.19 \times 10^{-3}$    | $9.15 \pm 0.14 \times 10^{-4}$   | $0 \pm 2.64 \times 10^{-5}$         |
| M20                   | $3.67 \pm 0.13 \times 10^{-3}$    | $5.37 \pm 0.08 \times 10^{-4}$   | -                                   |

<sup>a</sup>. P, B and M represent  $\alpha$ -pinene, blank and m-xylene experiments, respectively. <sup>b</sup>. Uptake coefficient leading to NOC including NH<sub>x</sub> fragments in the derivation from 0 to 150 min. <sup>c</sup>. Uptake coefficient for NH<sub>3</sub> leading to inorganic ammonium (ie: using NH<sub>x</sub> fragments only). <sup>d</sup>. Uptake coefficient leading to NOC including NH<sub>x</sub> fragments in the derivation from 400 to 1200 min.

## References:

- Atkinson, R., and Arey, J.: Atmospheric Degradation of Volatile Organic Compounds, *Chem. Rev.*, 103, 4605-4638, doi: 10.1021/cr0206420, 2003.
- Bruns, E. A., Perraud, V., Zelenyuk, A., Ezell, M. J., Johnson, S. N., Yu, Y., Imre, D., Finlayson-Pitts, B. J., and Alexander, M. L.: Comparison of FTIR and Particle Mass Spectrometry for the Measurement of Particulate Organic Nitrates, *Environ. Sci. Technol.*, 44, 1056-1061, doi: 10.1021/es9029864, 2010.
- Lin-Vien, D., Colthup, N. B., Fateley, W. G., and Grasselli, J. G.: *The Handbook of Infrared and Raman Characteristic Frequencies of Organic Molecules*, A Division of Harcourt Brace & Company 525 B Street, Suite 1900, San Diego, California 92101-4495, 1991.
- Miller, F. A., and Wilkins, C. H.: Infrared Spectra and Characteristic Frequencies of Inorganic Ions, *Anal. Chem.*, 24, 1253-1294, doi: 10.1021/ac60068a007, 1952.
- Nguyen, T. B., Laskin, A., Laskin, J., and Nizkorodov, S. A.: Brown carbon formation from ketoaldehydes of biogenic monoterpenes, *Faraday Discuss.*, 165, 473-494, doi: 10.1039/C3FD00036B, 2013.
- Schwartz, R. E., Russell, L. M., Sjostedt, S. J., Vlasenko, A., Slowik, J. G., Abbatt, J. P. D., Macdonald, A. M., Li, S. M., Liggio, J., Toom-Sauntry, D., and Leaitch, W. R.: Biogenic oxidized organic functional groups in aerosol particles from a mountain forest site and their similarities to laboratory chamber products, *Atmos. Chem. Phys.*, 10, 5075-5088, doi: 10.5194/acp-10-5075-2010, 2010.
- Simons, W. W.: *The Sadtler Handbook of Infrared Spectra.*, William Walter Simons, Philadelphia: Sadtler Research Laboratories, 1978.
- Stuart, B. H.: *Infrared Spectroscopy: Fundamentals and Applications*, Wiley, 244 pp., July 2004.
- Zhang, D., and Zhang, R.: Ozonolysis of  $\alpha$ -pinene and  $\beta$ -pinene: Kinetics and mechanism, *J. Chem. Phys.*, 122, 114308-114318, doi: 10.1063/1.1862616g, 2005.
